# Supplementary material
Source: Springer Nature journal article supplement (https://www.springermedizin.de/resource/supplementary/12916_2010_286_MOESM5_ESM.pdf/9599556)

**A**

|            | AA   | CAU  | Matrigel |
|------------|------|------|----------|
| T47D       | 2/12 | 5/12 | 2/11     |
| MDA-MB-231 | 2/19 | 4/14 | 3/18     |

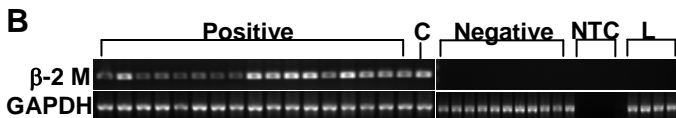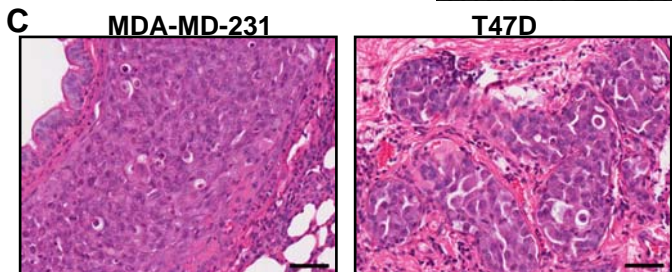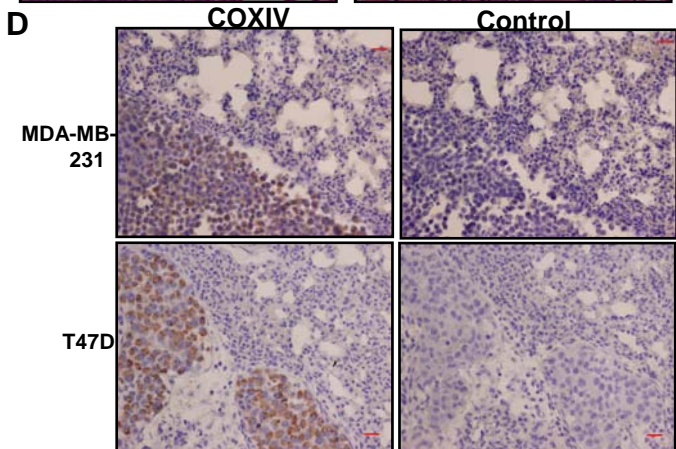

Supplement: MOESM5 [file 9599556]
